# Supplementary material
Source: PubMed Central journal article supplement (PMC4380844)

wt/wt

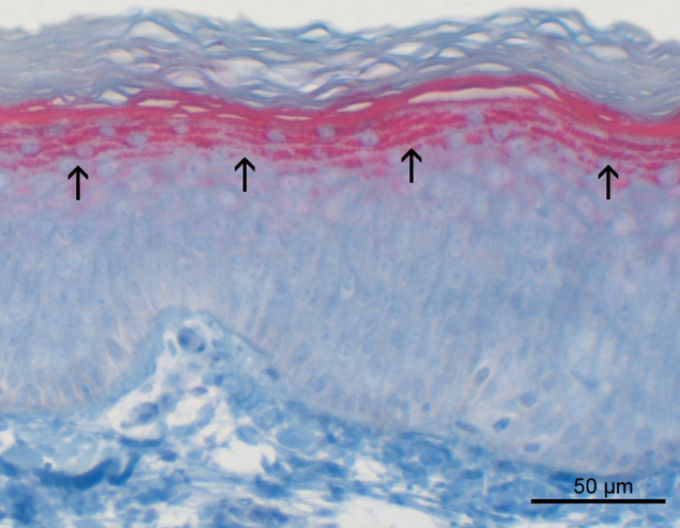

50 μm

Supplement: mmc1.pdf [file mmc1.pdf]
